# Supplementary material
Source: Elsevier journal article supplement (https://www.sciencedirect.com/science/article/pii/S1885585722002092)
Supplement: mmc1 [file S1885585722002092:mmc1.pdf]

**Supplementary data**

**Table 1 of the supplementary data.** Risk scores in pulmonary arterial hypertension and variables included in the score

|                                                                                            |
|--------------------------------------------------------------------------------------------|
| <b>REVEAL 2.0 score</b>                                                                    |
| Revised REVEAL score with existing variables and revised risk points and new variables     |
| Hospitalization within the last 6 mo                                                       |
| Estimated glomerular filtration rate < 60 mL/min 1.73m <sup>2</sup> or renal insufficiency |
| <b>Right heart score</b>                                                                   |
| Right ventricular function, using fractional area change                                   |
| Right atrial enlargement index                                                             |
| Systolic blood pressure                                                                    |

**Figure 1 of the supplementary data.** Reproducibility of RVESRI

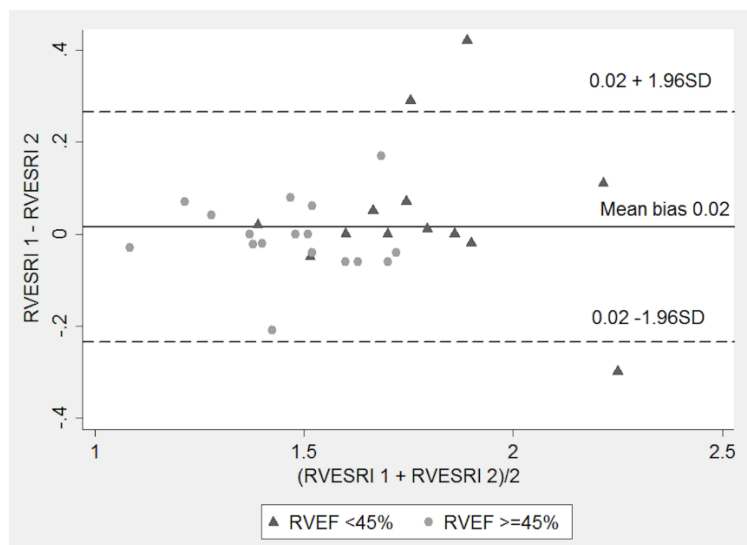

RVESRI, right ventricular end-systolic remodeling index; RVEF, right ventricular ejection fraction.
